# Supplementary material
Source: Springer Nature journal article supplement (https://www.springermedizin.de/resource/supplementary/12974_2005_43_MOESM3_ESM.pdf/9600656)

**A.**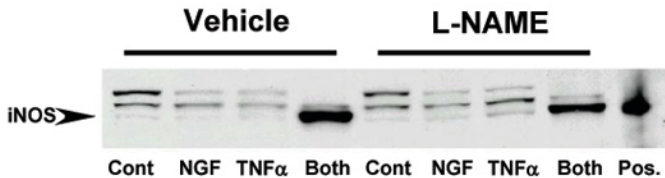**B.**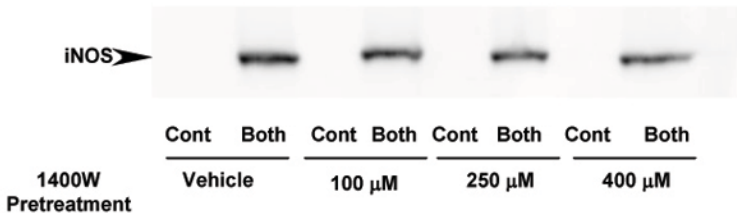

Supplement: MOESM3 [file 9600656]
